# Supplementary material for: Epigenetic histone acetylation modulating prenatal Poly I:C induced neuroinflammation in the prefrontal cortex of rats: a study in a maternal immune activation model
Source: Frontiers journal article supplement (doi:10.3389/fncel.2022.1037105), 2022-11-28
Supplement: Data_Sheet_1.PDF [file Data_Sheet_1.PDF]

**A** *Nlrp3* (NC\_005109.4)

gagggctcaacttctaggaggatccatggagctgaggcaacagtcagcaagaaccctggagatgacagaaagaaagat  
gtgaggtgctgcagga(-1027)aactggagaggtggtgcaagaacggacacaaaacagggatggtgagcttgagg  
cacctgaatgtcacctt(-1097)gcc.....tcc(-464)aggtcccagactcatcaccatgggttctggtctacacgg  
gtcccggtgacctgtgtgtgctgtctctgcacgccgtatctggtt(-378)gtg.....ctg[atg](0) aagatgatgagtg

**B** *Rela* (NC\_051336.1)

aatgttaagaacttctctgagttgccatctctagcccttatttttcagtaagtacactcatgttcatattaattgcaactatat  
gtcagttttta(-1295)aaagtgggttcgtgcgaggatcaatgatggctgtgtgccattaatcggagaccataattcattct  
gtcaccttgatgtccgc(-1214)ccc.....gac(-765)ctatctgtggaggcgaagccctggagctcttcacgattca  
ttgctctcagggacitctagaggtacaggtgtctacctcgggccctctacac(-671)caa.....gcc[atg](0)gac

**D** *Gabrb3* (NC\_051336.1)

atgcgagtttatcgacaagatttctctttacggttcattatga(-1372)atgcgtttacgtgagcaggaaggattcagcactc  
atatggtgtgcaggagagggcgagcttaaggagactgct(-1279)ttt.....agcctctgcagcttgatacggaccag  
gcag(-997)agcgcccaggctccttgcggtgccactggctctcccgcttagcagggcggggtgaaggtggagggg  
gggatagggcgagaaatgtctctggtgccggtg ctttgcattccatcc (-835) ttc.....cgc[gcg](0)gcgccgc

**C** *Grin2a* (NC\_051345.1)

ctgggatagccgcccccggtgggggtgatgcggacagcgcgggacagccaggggagcgcgcgggggccgcagcat  
gcg(-1585)ggaacccgctaaacctgggtggtgctgaggcggccgagatgctcgtgcgcgcagcacgccccattgc  
atctccaccttctcgggtacaggtatgtcttagtgacacaggcttccca(-1446)ggc.....tgc(-1315)actccac  
cttgctcaccttaaaatgccaggctggagttgccccaaftccccgggtacaacaacaacggggcgagggg  
cgcactgtactcgcgtgcacgatcgtgcaggcattttcagac(-1168)aag.....acd[atg](0)ggc

**E** *Htr2a* (NC\_051350.1)

gaacgtgtgtcaccactgtcagccatccctcctggacacataacc(-1380)actggtgtggctagaagtgcagatgcc  
cctagatcccaggacgtgcggtttttagccttattttttcacacttcgccccctc(-1294)agc.....agg(-749)cg  
agtcacaggatagcggaccctggcgacaacgaatgtaagttcctgggtgctgtcttttactgctgtgggattttcttctg  
cttaagtcacgcttgccc(-647)acg.....gac[atg](0)gaaattcttgtgaagacaatatctctctgagctcaat

**Supplementary Figure 1 Primer design for ChIP-qPCR.** (A) *Nlrp3*, (B) *Rela*, (C) *Grin2a*, (D) *Gabrb3*, and (E) *Htr2a*. The red sequence blocked with dotted box is the position of initiation codon. The region of PCR amplification was presented with purple italics, and the extensional direction was indicated by a red arrow. The sequence marked with purple underlines are the PCR primers. The primers were self-designed through the Primer-BLAST in the National Center for Biotechnology Information (NCBI) (<https://www.ncbi.nlm.nih.gov/tools/primer-blast/>).

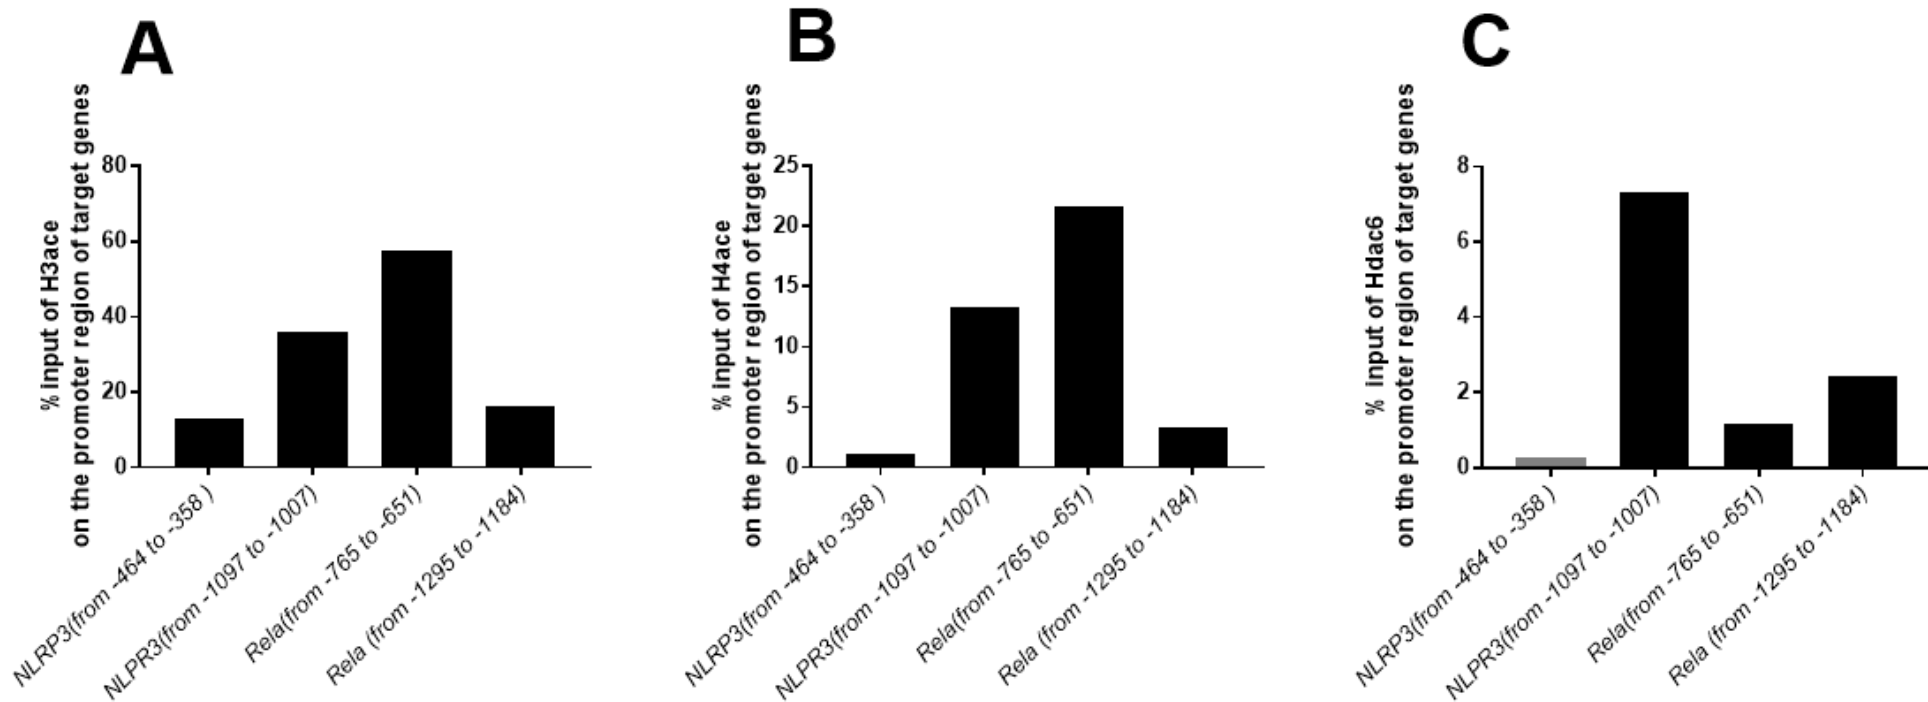

**Supplementary Figure 2 Pre-experiment of ChIP-qPCR for *Nlrp3* and *Rela*.** The condition of acetylated histones marking on the specified loci of promoter of target genes involved in neuroinflammation were evaluated by ChIP-qPCR using antibodies of (A) acetylated histone 3 (H3ace), (B) acetylated histone 4 (H4ace), and (C) Hdac6.

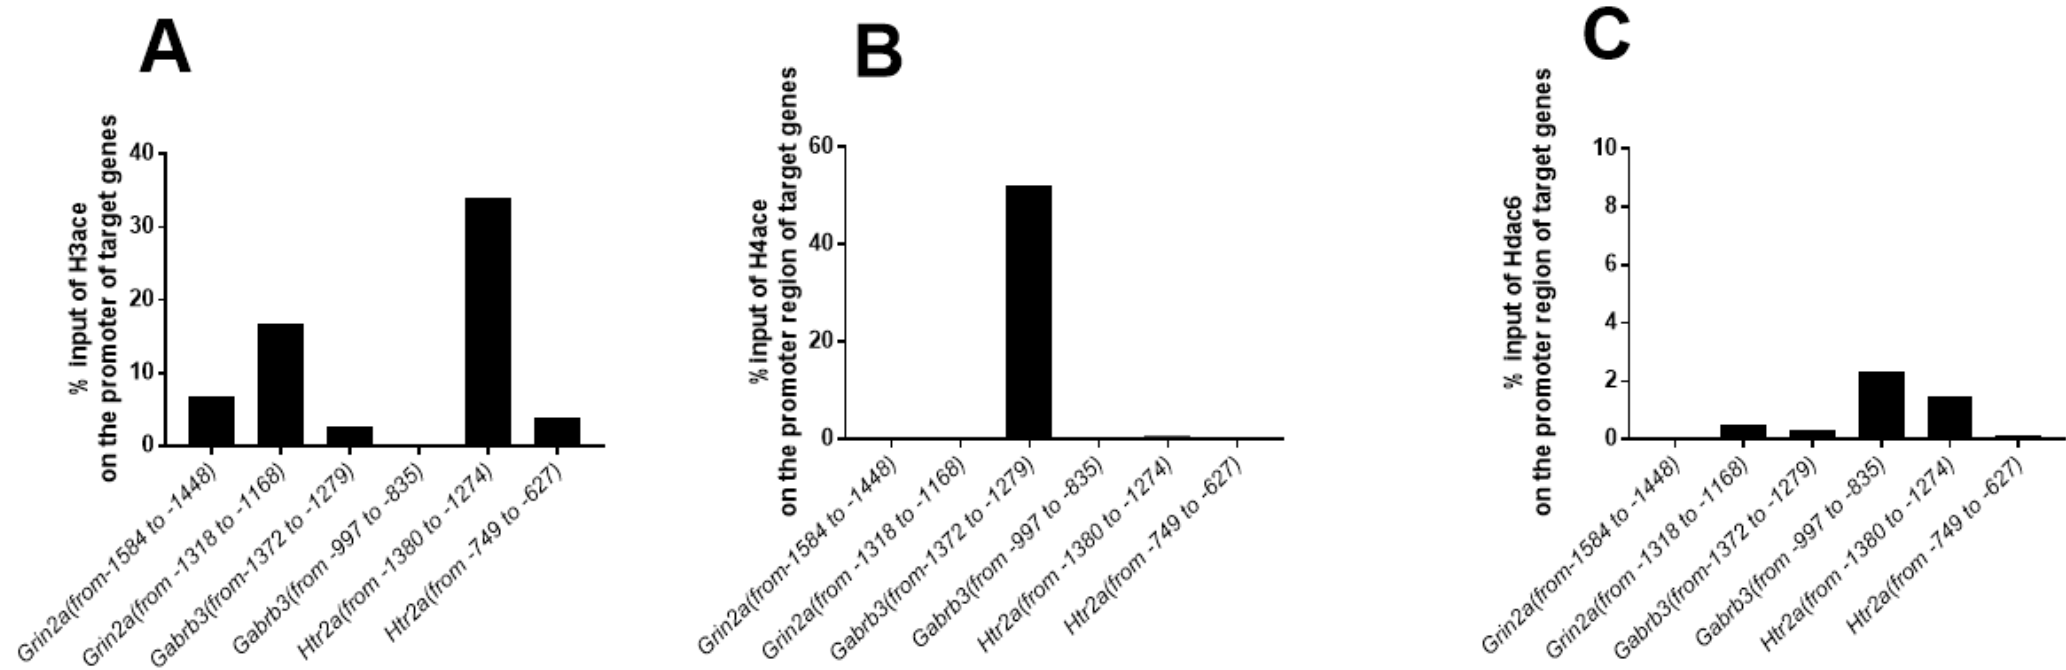

**Supplementary Figure 3 Pre-experiment of ChIP-qPCR for neurotransmitter receptors (*Grin2a*, *Htr2a*, *Gabrb3*).** The condition of acetylated histones marking on the specified loci of promoter of target genes encoding neurotransmitter receptors was evaluated by ChIP-qPCR using antibodies of (A) acetylated histone 3 (H3ace), (B) acetylated histone 4 (H4ace) and (C) Hdac6.

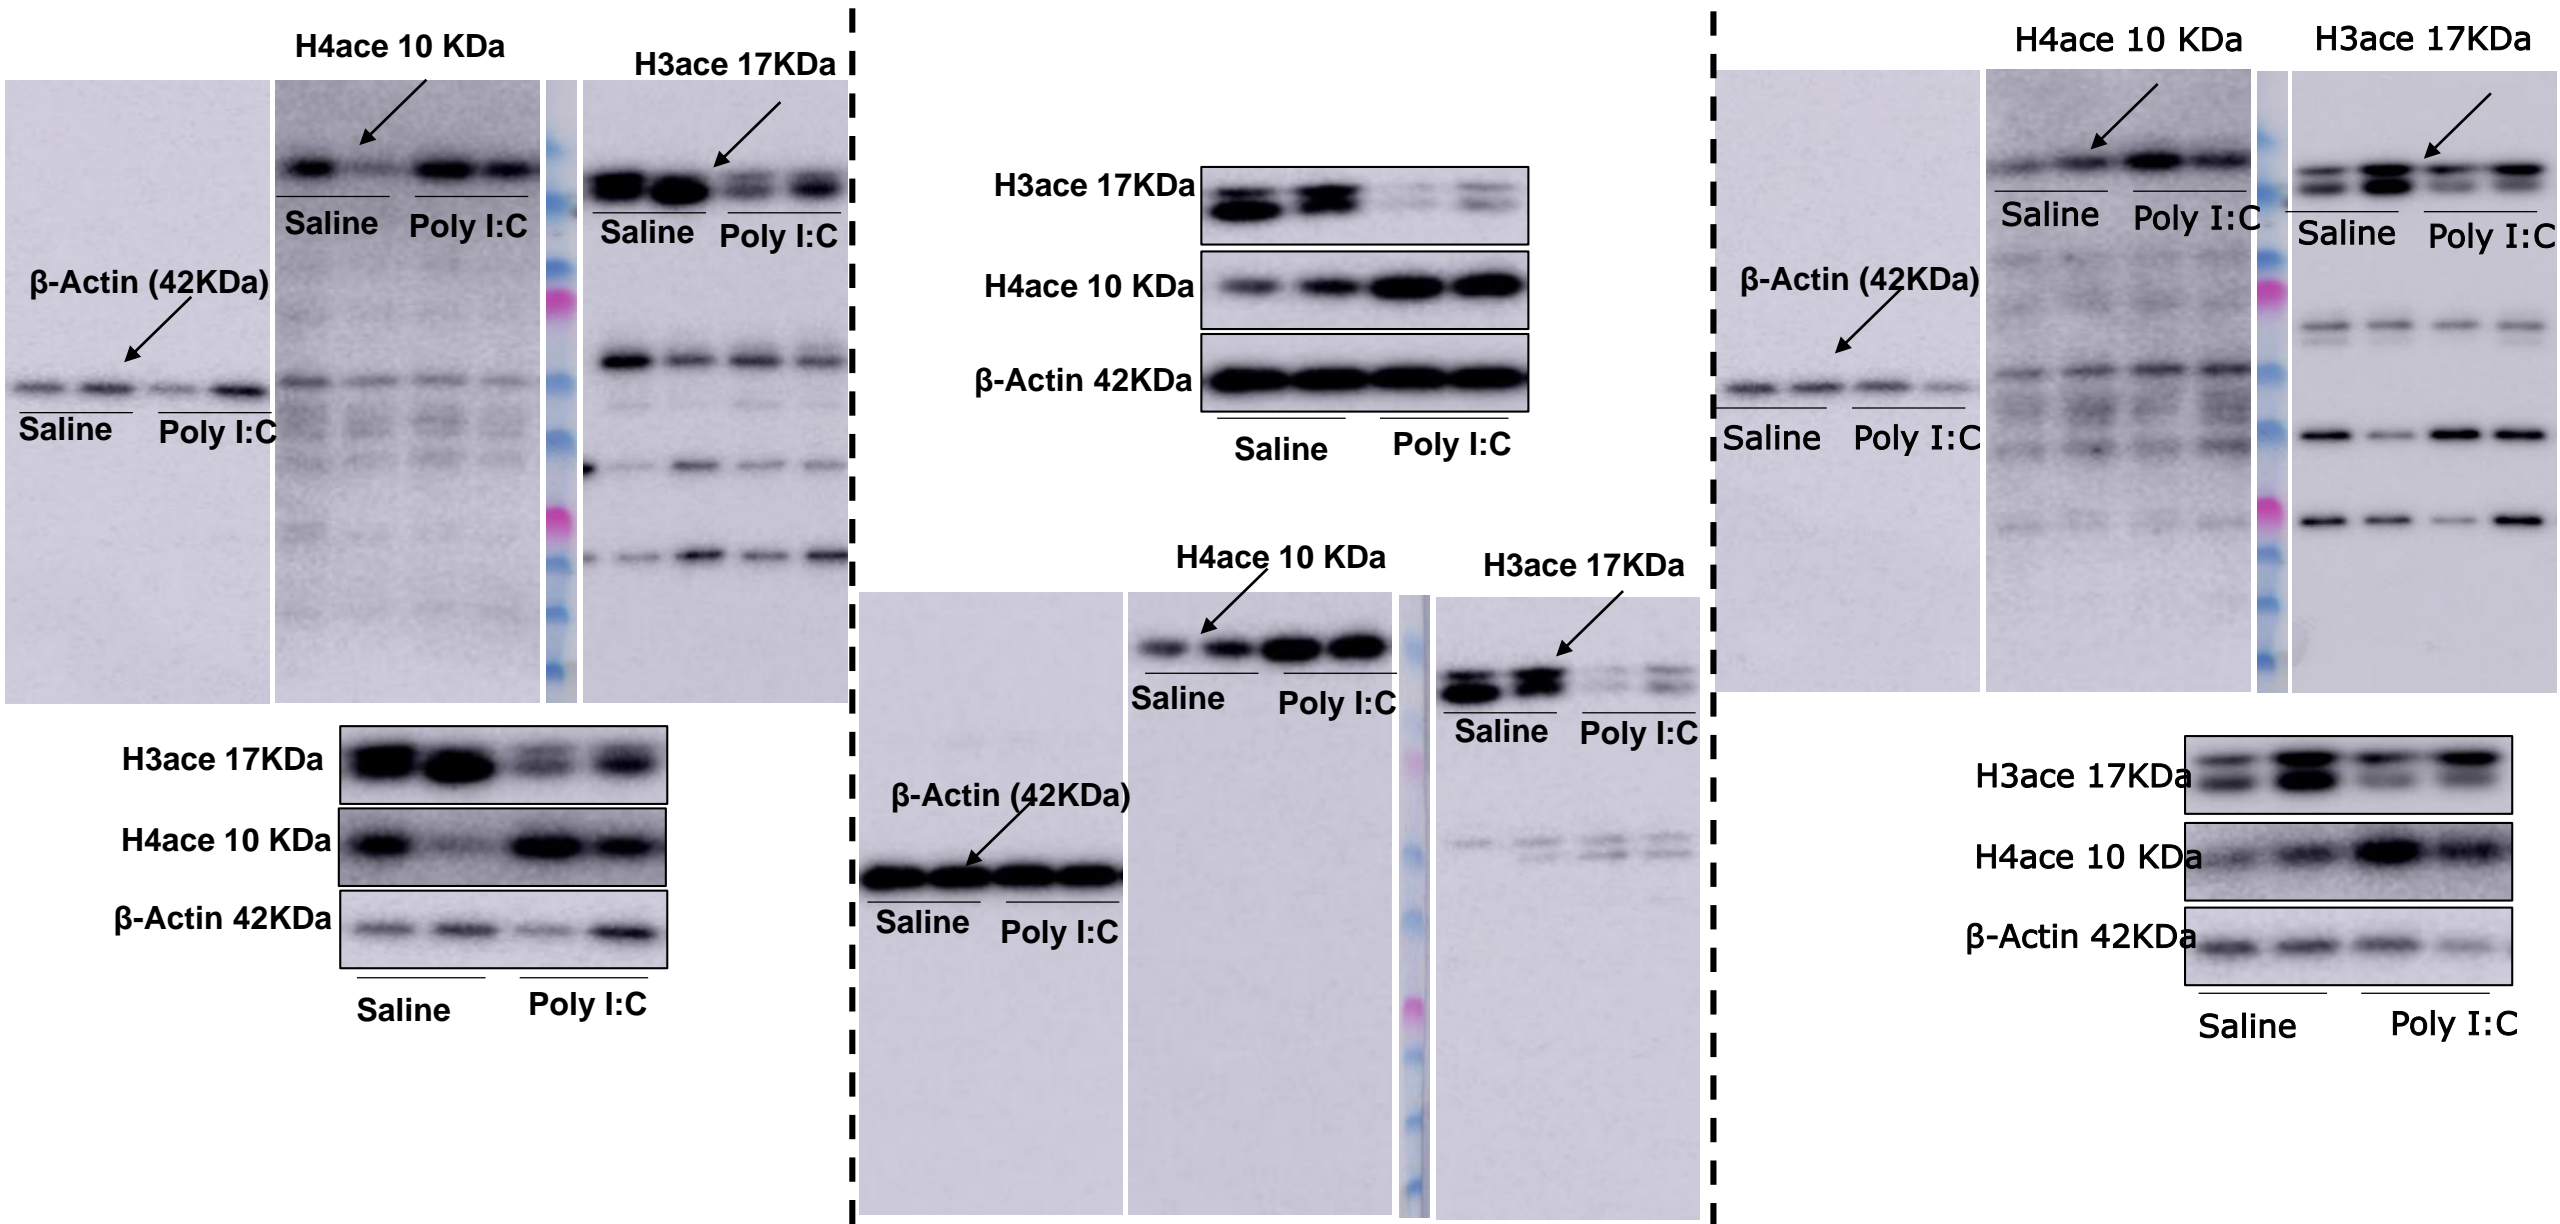

**Supplementary Figure 4 Original western blot images of hepatic global H3ace and H4ace (n=6/group.** The results were visualized by an Amersham GelImager 600. The molecular weights of H3ace, H4ace and Actin are 17kDa, 10kDa and 43kDa, respectively.
